# Supplementary material for: Nicotinamide Mononucleotide Adenylyl Transferase 2: A Promising Diagnostic and Therapeutic Target for Colorectal Cancer
Source: Hindawi journal article supplement (doi:10.1155/2016/1804137), 2016-01-01
Supplement: f1 [file 1804137.f1.pdf]

**Fig. S1** The expression of NMNAT2 protein in different pairs of tumor- peritumorial tissue samples of CRC was measured by western blot.

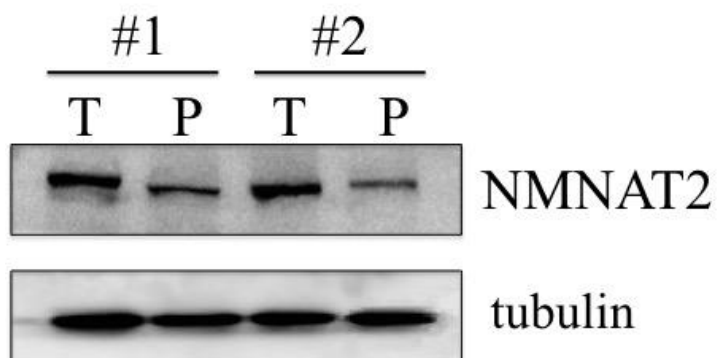

T represents tumor tissue, and P represents corresponding peritumorial tissue.

**Fig. S2.** NMNAT2 Immunohistochemical staining in CRC tissues with different TNM stage ( $\times 200$ )

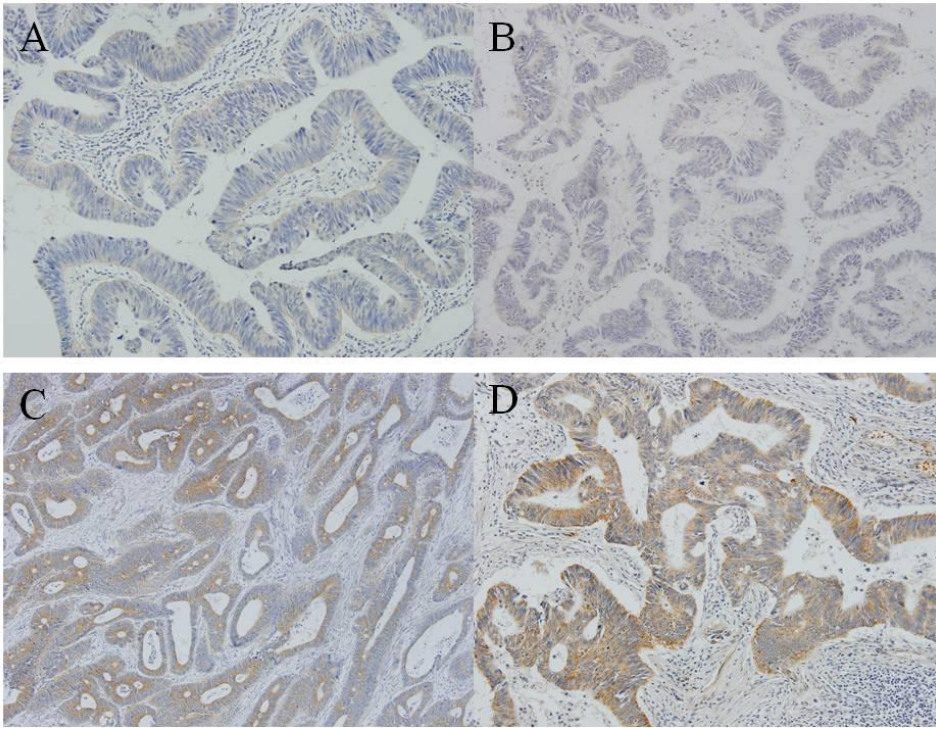

(A) negative in TNM stage I (intensity score 0, percentage score 0 )and(B) negative in TNM stage II (intensity score 1, percentage score 1)and(C)positive in TNM stage III (intensity score 2, percentage score 3)(D)positive in TNM stage IV (intensity score 3, percentage score 3)
